# Supplementary material for: Atypical Social Rank Recognition in Autism Spectrum Disorder
Source: PubMed Central journal article supplement (PMC6821924; doi:10.1038/s41598-019-52211-8), 2019-10-30
Supplement: 41598_2019_52211_MOESM1_ESM.pdf [file 41598_2019_52211_MOESM1_ESM.pdf]

## **Supplemental Information**

Atypical Social Rank Recognition in Autism Spectrum Disorder

S. Ogawa, M. Iriguchi, Y-A. Lee, S. Yoshikawa, & Y. Goto

### **Supplemental Figure S1**

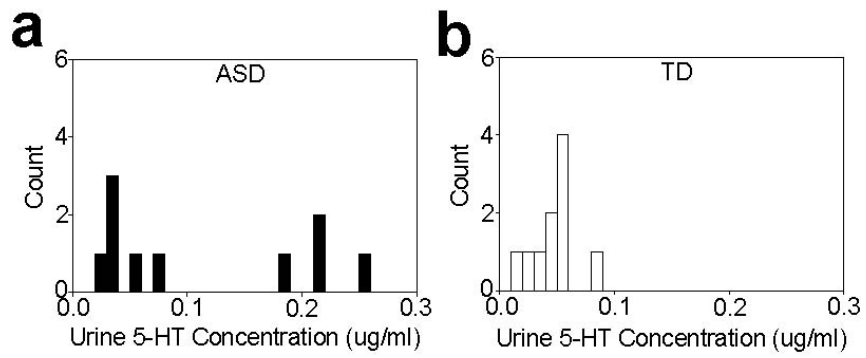

**Supplementary Figure S1. Urine serotonin (5-HT) concentration in autism spectrum disorder (ASD) and typically developing (TD) children.**  
(a, b) Histograms showing distributions of ASD (a) and TD (b) children.
